# Supplementary material for: DP4-AI automated NMR data analysis: straight from spectrometer to structure
Source: Chem Sci. 2020 Mar 6;11(17):4351–9. doi: 10.1039/d0sc00442a (PMC8152620; doi:10.1039/d0sc00442a)
Supplement: SC-011-D0SC00442A-s001 [file SC-011-D0SC00442A-s001.xlsx]

## Sheet: Sheet1
Correct	x
	Data
molecule	Max - overall	Max - carbon	Max - proton
AT1	73.7	28.8	87.4
AT2	100	97.1	100
AT3	99.9		99.9
BYH1	0	0	0.1
BYH2	0	0.1	0
IP1	48.4	13.1	52.9
IP2	0	0.9	0.1
IP3	54.2	30.2	73.2
IP4	99.4	93.3	92.7
IP5	74.6	97.1	6.6
JB1	3.6	81.6	0.8
JB10	97.7	32.7	97.2
JB11	0	56.7	0
JB12	0.3	4.7	1.1
JB13A	100	100	89.6
JB13B	22.8	18.8	46.6
JB2	0	2.3	0
JB3	91.5	85.8	7.8
JB4	100	40.5	100
JB5	97.9	54.8	84.3
JB6	97.5	4.6	94.9
JB7	1.6	0	83.1
JB8	95.8	91.3	25.6
JB9	87.9	81.5	57.4
KE1	100	100	98
KE2	42.6	33.8	2.5
KE3	99.5	98.3	23.1
NL1A	97.3		97.3
NL1B	93.6	31.3	65.9
NL2A	0	0.1	0
NL2B	0	0	9.1
NP1	87.7	80.2	7.7
NP2	99.8	95.1	26.2
NP3A	0.8	16	1.3
NP3B	0.9	14.7	0.7
NP4	53.5	16.2	4.2
NP5	100	99.8	99.7
OD1	17.9	8.3	0.1
TP1	1.2	50.7	0.4
TP2	34.3	15.8	16.4
TP3	52.8	26.9	40.3
TP4	1.3	30.3	0
TS1	0	20.8	0
TS2	0	0.9	0
TS3A	0		0
TS3B	99.6	35	98.9
TS4	0		0
Total Result	100	100	100

## Sheet: Opt_E_crossvalidation
molecule	stereochemistry	overall	carbon	proton	Correct	pair_overall	pair_carbon	pair_proton		-2.91277
AT1	-+	26.3	71.2	12.6		17.1	67.1	9.2		-9.2
AT1	--	73.7	28.8	87.4	x	82.9	32.9	90.8		9.2
AT2	-+	100	97.1	100	x	100	99.5	100
AT2	--	0	2.9	0		0	0.5	0		0
AT3	-+	99.9		99.9	x	99.7	nan	99.7		-0.2
AT3	--	0.1		0.1		0.3	nan	0.3		0.2
BYH1	---	100	100	80.7		66.4	16.6	19.5
BYH1	-++	0	0	0		1.7	78.4	0.1		1.7
BYH1	-+-	0	0	0.1	x	8.6	3.4	12.5		8.6
BYH1	--+	0	0	19.2		23.3	1.7	67.9
BYH2	---	99.4	96	86.8		99.3	32.2	89.5		-0.1
BYH2	-++	0.6	3.8	13.1		0.5	1.3	10.3
BYH2	-+-	0	0.1	0	x	0.3	56.1	0.1		0.3
BYH2	--+	0	0	0		0	10.3	0
IP1	-++	4.2	39.4	1.5		4.2	39	1.6
IP1	-+-	8.6	34.4	3.6		9.9	34	4.3
IP1	--+	38.8	13.2	42		36.4	13.5	39.7
IP1	---	48.4	13.1	52.9	x	49.5	13.4	54.4
IP2	--	100	99.1	99.9		0.4	100	0
IP2	-+	0	0.9	0.1	x	99.6	0	100
IP3	-+	45.8	69.8	26.8		48.1	69.8	28.7		2.3
IP3	--	54.2	30.2	73.2	x	51.9	30.2	71.3
IP4	--	99.4	93.3	92.7	x	99.9	94.3	97.7
IP4	-+	0.6	6.7	7.3		0.1	5.7	2.3
IP5	-++	74.6	97.1	6.6	x	74.5	85.7	32.5
IP5	---	25.4	2.8	77.1		25.5	14.2	67.3		0.1
IP5	--+	0	0	0.3		0	0	0
IP5	-+-	0	0	16		0	0.1	0.1
JB1	---	3.6	81.6	0.8	x	100	11.1	100
JB1	-++	96.4	18.1	99.2		0	87.7	0
JB1	--+	0	0.1	0		0	0.4	0
JB1	-+-	0	0.1	0		0	0.8	0		0
JB10	---	0.6	44	0.4		86.2	85.1	35.3
JB10	--+	97.7	32.7	97.2	x	5.8	7.5	27.3
JB10	-++	1.7	23.3	2.4		8	7.4	37.5		6.3
JB10	-+-	0	0	0		0	0	0
JB11	-++-	0	56.7	0	x	0	7.7	0
JB11	--++	100	29.3	99.9		100	91.8	99.6
JB11	---+	0	8.9	0		0	0	0
JB11	-+-+	0	5.1	0		0	0	0
JB11	-+++	0	0	0		0	0	0		0
JB11	--+-	0	0	0		0	0	0
JB11	----	0	0	0		0	0	0
JB11	-+--	0	0	0.1		0	0.5	0.4
JB12	--+-	98	94	18.3		0.3	77.6	0
JB12	-+++	0.3	4.7	1.1	x	91.7	12.8	39
JB12	----	0	0.9	0		0.7	7.5	0.5
JB12	-+-+	1.7	0.4	80.6		0	1	0		-1.7
JB12	-++-	0	0	0		0	0	1.2
JB12	-+--	0	0	0		0	0	19.6
JB12	--++	0	0	0		7.3	1	39.4
JB12	---+	0	0	0		0	0	0.3
JB13A	-++	100	100	89.6	x	100	100	88.1
JB13A	--+	0	0	0		0	0	0
JB13A	---	0	0	1.5		0	0	0.6
JB13A	-+-	0	0	9		0	0	11.3
JB13B	---	77.2	81.2	36.5		99.9	99.9	40.2
JB13B	-++	22.8	18.8	46.6	x	0.1	0.1	48.1
JB13B	--+	0	0	0.3		0	0	0.3		0
JB13B	-+-	0	0	16.5		0	0	11.3
JB2	-+-	96.5	96.9	0		0	90.9	0
JB2	--+	0	2.3	0	x	0	8.4	0
JB2	-++	0	0.8	0		0	0.6	0		0
JB2	---	3.5	0	100		100	0.1	100
JB3	-+-	91.5	85.8	7.8	x	100	100	14
JB3	---	0.1	11.2	0		0	0	0
JB3	-++	8.1	2.9	20.3		0	0	0		-8.1
JB3	--+	0.4	0	71.9		0	0	86		-0.4
JB4	-+	0	59.5	0		0	31.5	0
JB4	--	100	40.5	100	x	100	68.5	100
JB5	---	97.9	54.8	84.3	x	100	22.9	100
JB5	--+	0	34.6	0		0	76.3	0
JB5	-+-	1.8	6.9	12.1		0	0.5	0
JB5	-++	0.3	3.7	3.6		0	0.3	0
JB6	----+	0	25.6	0		0	1.7	0
JB6	-+---	0.1	24.6	0		0	1.3	0
JB6	-+--+	0	16	0		0	22.6	0
JB6	---++	0	7.4	0		0	22.6	0
JB6	-++++	97.5	4.6	94.9	x	100	22.5	98.4
JB6	--+--	0	3.8	0		0	0.5	0
JB6	-+-++	0	3.7	0		0	0.1	0
JB6	--+++	0	3.3	0		0	10.7	0
JB6	-+-+-	0.6	3.2	0.9		0	0.9	0
JB6	--++-	0.2	2.1	0.4		0	0.3	1.1
JB6	-----	1.5	1.8	3.7		0	0.7	0.4
JB6	-+++-	0	1.7	0		0	0.1	0
JB6	-++--	0	1.6	0		0	0.5	0.1
JB6	--+-+	0	0.4	0		0	10.3	0
JB6	-++-+	0	0.1	0		0	5.1	0
JB6	---+-	0	0.1	0		0	0.1	0
JB7	-+++-	3.3	72.8	0		0	23.4	0		-3.3
JB7	--++-	0	23.8	0		0	45.9	0
JB7	-++--	0.1	2.9	0		99.4	10.8	48.1
JB7	-+--+	0	0.2	0		0	0.8	0
JB7	--+--	0	0.1	0		0	4.7	0
JB7	-+---	94.9	0	16.8		0.2	1.3	0.9
JB7	-++++	1.6	0	83.1	x	0	0.2	0
JB7	-++-+	0	0	0		0	8.8	0
JB7	-+-++	0	0	0		0	0.1	0
JB7	-+-+-	0	0	0		0	0.1	0
JB7	--+++	0	0	0		0	0	0
JB7	--+-+	0	0	0		0	0.2	0
JB7	---++	0	0	0		0.3	0	50.8
JB7	---+-	0	0	0		0	1.3	0
JB7	----+	0	0	0		0	0	0
JB7	-----	0	0	0		0.1	2.5	0.2
JB8	-++++	95.8	91.3	25.6	x	26.3	91.4	0.5
JB8	-+++-	2.6	3.8	16.9		67.6	3.7	29.4
JB8	-++--	1.3	2.7	11.8		4.6	2.7	2.7
JB8	--+--	0.2	1.2	3.9		0.1	1.2	0.2
JB8	-++-+	0.1	0.9	1.9		0	0.9	0		-0.1
JB8	-++--	0	0	6.8		0	0	1.3
JB8	-+-+-	0	0	8.4		1.2	0	57.9
JB8	-+-++	0	0	24.7		0.1	0	7.9
JB9	--+	87.9	81.5	57.4	x	72.4	81.5	34
JB9	---	12.1	18.2	35.3		27.5	18.2	58
JB9	-++	0	0.3	7.2		0.1	0.3	8
JB9	-+-	0	0	0.1		0	0	0
KE1	-+-	100	100	98	x	100	100	72.1
KE1	--+	0	0	0		0	0	0
KE1	---	0	0	0.1		0	0	0
KE1	-++	0	0	2		0	0	27.9
KE2	-++++	42.6	33.8	2.5	x	27	35.7	0.2
KE2	--+-+	14.4	30.6	0.9		1.8	22.3	0
KE2	-+-+-	0	17.2	0		0	20.4	0
KE2	-+++-	30.7	7.3	8.2		4.3	10.2	0.1
KE2	-----	1.3	6.2	0.4		5.8	6.1	0.3
KE2	--+++	0	2.2	0		0	2.8	0
KE2	----+	0	1.7	0		0	1.8	0
KE2	-+-++	0	0.8	0		0	0.6	0
KE2	--+--	11	0.2	88		61.1	0.2	99.4		50.1
KE2	-++-+	0	0	0		0	0	0
KE2	-++--	0	0	0		0	0	0
KE2	-+--+	0	0	0		0	0	0
KE2	-+---	0	0	0		0	0	0
KE2	---++	0	0	0		0	0	0
KE2	---+-	0	0	0		0	0	0
KE2	--++-	0	0	0.1		0	0	0
KE3	-+--+	99.5	98.3	23.1	x	99.3	98.7	22.3
KE3	---+-	0.1	0.7	4		0.1	0.7	4
KE3	--++-	0	0.5	0.1		0	0	0.1
KE3	---++	0.3	0.2	25.2		0.5	0.4	27.2
KE3	-+-++	0	0.2	0		0	0	0
KE3	----+	0.1	0	46.6		0.1	0	45.3
KE3	-+---	0	0	0		0	0	0
KE3	-+-+-	0	0	0		0	0	0
KE3	-++-+	0	0	0		0	0	0
KE3	-++--	0	0	0		0	0	0
KE3	-++++	0	0	0		0	0	0
KE3	-+++-	0	0	0		0	0	0
KE3	--+-+	0	0	0		0	0	0
KE3	--+--	0	0	0		0	0	0
KE3	--+++	0	0	0		0	0	0
KE3	-----	0	0	1		0	0.1	1
NL1A	--+	97.3		97.3	x	42.1	nan	42.1
NL1A	-+-	2.7		2.7		57.9	nan	57.9
NL1A	---	0		0		0	nan	0
NL1A	-++	0		0		0	nan	0
NL1B	-+-	2.3	62.8	0.8		0.1	49.6	0.1
NL1B	-++	93.6	31.3	65.9	x	99.9	49.8	99.9
NL1B	---	3.1	4.8	14		0	0.2	0
NL1B	--+	1	1.2	19.3		0	0.4	0
NL2A	--++-	0	45.3	0		0	0	0
NL2A	-+--+	98.8	30.1	0		0	0	0.2
NL2A	----+	1.1	14.7	0		0	0	0
NL2A	-+++-	0.1	9.8	0		0	0	0.1
NL2A	-++++	0	0.1	0	x	0	0	0.1
NL2A	-++--	0	0	0		0	0	0.1
NL2A	-+-++	0	0	0		37.7	36.6	4.4
NL2A	-+---	0	0	0		12.8	0.7	76.9
NL2A	--+++	0	0	0		48.8	62.4	3.4
NL2A	--+-+	0	0	0		0	0	0.8
NL2A	--+--	0	0	0		0	0	0.2
NL2A	---++	0	0	0		0	0	0
NL2A	-----	0	0	0		0.7	0.3	10.1
NL2A	---+-	0	0	4.5		0	0	0.5
NL2A	-+-+-	0	0	28.8		0	0	0.5
NL2A	-++-+	0	0	66.7		0	0	2.6
NL2B	-+-+-	0	44.7	0		0	0	0
NL2B	--++-	0.1	28.7	0		0	0	0.3
NL2B	-+---	0.2	17.9	0		0	0.3	0.4
NL2B	--+-+	88.5	8	16.5		0	0	0
NL2B	-----	0	0.4	0		0	0	0.4
NL2B	--+++	11.2	0.2	73		0	0.7	0.2
NL2B	---+-	0	0.1	0		0	0	0
NL2B	-+-++	0	0	0		41.6	80.1	5.9
NL2B	-++++	0	0	0		5.9	10.1	6.7
NL2B	-+++-	0	0	0		0	0	0.8
NL2B	-++-+	0	0	0		0	0	0
NL2B	-++--	0	0	0		0.6	0.8	8.2
NL2B	--+--	0	0	0.4		51.9	7.8	76.3
NL2B	-+--+	0	0	0.4		0	0.2	0.2
NL2B	----+	0	0	0.5		0	0	0.6
NL2B	---++	0	0	9.1	x	0	0	0
NP1	--++---	87.7	80.2	7.7	x	94.9	80.4	1.5
NP1	+------	0	10.6	0		0	10.6	0
NP1	--+----	0.2	2.3	0.7		0	2.3	0
NP1	++++---	9.9	1.4	48.4		0	1.4	0
NP1	+-++---	0.1	1.3	0.4		0.1	1.3	0.1
NP1	-+++---	0.3	1	1.9		0	1	0
NP1	++-----	0	0.9	0.2		0	0.9	0
NP1	++-+---	1.7	0.6	18.9		0	0.6	0
NP1	+-+----	0	0.6	0		0	0.6	0
NP1	+---+--	0	0.2	0.1		0	0.2	0
NP1	-+-+---	0	0.2	1.4		0	0.2	0
NP1	---+---	0	0.1	0		0	0.1	0
NP1	+--+---	0	0.1	0		0	0.1	0
NP1	+--++--	0	0.1	2.9		4.9	0.1	55.9
NP1	-++----	0.1	0	11		0	0	0
NP1	--+-+--	0	0	0		0	0	0
NP1	-------	0	0	0		0	0	0
NP1	----+--	0	0	0		0	0	0
NP1	-+-----	0	0	0		0	0	0
NP1	-+--+--	0	0	0		0	0	0
NP1	+-+++--	0	0	0		0	0	0
NP1	+-+-+--	0	0	0		0	0	0
NP1	+++++--	0	0	0		0	0	0
NP1	+++-+--	0	0	0		0	0	0.1
NP1	--+++--	0	0	0.1		0	0	0.2
NP1	+++----	0	0	0.1		0	0	0
NP1	-+-++--	0	0	0.4		0	0	0
NP1	++-++--	0	0	0.4		0	0	0
NP1	---++--	0	0	0.5		0.1	0	42.2
NP1	++--+--	0	0	0.6		0	0	0
NP1	-++-+--	0	0	1		0	0	0
NP1	-++++--	0	0	3.2		0	0	0
NP2	------	99.8	95.1	26.2	x	98.9	95.3	18.8
NP2	---+--	0.1	3.4	0.9		0.9	3.6	4.5
NP2	-+++-+	0	0.9	0.7		0.1	1	1.5
NP2	-+++++	0	0.2	5.2		0	0	0.3
NP2	-+---+	0	0.1	0.3		0.1	0.1	10.4
NP2	---+-+	0	0	0		0	0	0.5
NP2	---++-	0	0	0		0	0	0.2
NP2	---+++	0	0	0		0	0	0
NP2	--+---	0	0	0		0	0	3.5
NP2	--+-+-	0	0	0		0	0	0
NP2	--+-++	0	0	0		0	0	0
NP2	--++--	0	0	0		0	0	0.4
NP2	--+++-	0	0	0		0	0	0.2
NP2	--++++	0	0	0		0	0	0
NP2	-+-+--	0	0	0		0	0	0
NP2	-+-++-	0	0	0		0	0	0
NP2	-++--+	0	0	0		0	0	0.6
NP2	-++-++	0	0	0		0	0	0.1
NP2	----++	0	0	0.1		0	0	0.4
NP2	-++---	0	0	0.1		0	0	1.6
NP2	-++-+-	0	0	0.1		0	0	0.2
NP2	-++++-	0	0	0.3		0	0	0
NP2	-+--++	0	0	0.4		0	0	6.1
NP2	-+-+++	0	0	0.6		0	0	0.2
NP2	----+-	0	0	0.7		0	0	0.8
NP2	--++-+	0	0	1		0	0	3.7
NP2	-----+	0	0	1.6		0	0	3.6		0
NP2	--+--+	0	0	3.3		0	0	2.9
NP2	-+++--	0	0	8.7		0	0	5.3
NP2	-+----	0	0	9.1		0	0	7.9
NP2	-+--+-	0	0	16.3		0	0	17.6
NP2	-+-+-+	0	0	24.2		0	0	8.7
NP3A	-+--	56.3	43.5	34.3		52	42.3	28.9
NP3A	--++	42.1	22.4	49.9		47.6	21.5	52
NP3A	-+-+	0.6	17.3	1		0.2	18.6	0.3
NP3A	---+	0.8	16	1.3	x	0.2	17.4	0.3
NP3A	-++-	0.3	0.7	10.2		0	0.1	0.2
NP3A	----	0	0.1	0.3		0	0.1	0
NP3A	--+-	0	0	0.1		0	0	0.3
NP3A	-+++	0	0	3		0	0	17.9
NP3B	-++-	6.7	45.2	1.6		45.6	42.7	19
NP3B	----	83.1	17.1	52.9		38	19.5	34.7
NP3B	--+-	0.9	14.7	0.7	x	5.4	14.1	6.8
NP3B	-+-+	1	10.9	1		6.8	11.3	10.8
NP3B	-+++	5	8.1	6.7		1.9	8.1	4.3		-3.1
NP3B	---+	0.1	1.9	0.3		0.4	1.8	3.7
NP3B	-+--	1.9	1.6	13.1		1.7	1.8	16.4
NP3B	--++	1.4	0.6	23.7		0.2	0.6	4.3
NP4	----	2.9	43.3	0.1		0.3	44.3	0.1
NP4	-++-	2	19.5	0.1		0	19.9	0
NP4	-+++	33.6	18.4	2.3		0.5	18.9	0.5
NP4	---+	53.5	16.2	4.2	x	99.2	16.7	97.6
NP4	--++	0.4	2.5	0.2		0	0	0.1
NP4	-+--	7.6	0.1	92.7		0	0.1	1
NP4	--+-	0	0	0.1		0	0	0
NP4	-+-+	0	0	0.3		0	0	0.7
NP5	---+	100	99.8	99.7	x	100	99.8	100
NP5	--++	0	0.2	0.3		0	0.2	0		0
OD1	--+	0	46.8	0		0	14.5	0
OD1	---	0	44.9	0		0	84.7	0
OD1	-+-	17.9	8.3	0.1	x	96.3	0.8	9.4
OD1	-++	82.1	0.1	99.9		3.7	0	90.6
TP1	-+--	1.2	50.7	0.4	x	1.5	50.6	0.4
TP1	----	0	19.3	0		0	19.2	0
TP1	--+-	98.4	16.4	89.1		98.4	16.5	88.2
TP1	-++-	0	6.7	0		0	6.7	0
TP1	-+-+	0.3	5	0.8		0	5	0.1
TP1	-+++	0	1.8	0		0	1.8	0
TP1	---+	0.1	0.1	9.5		0.1	0.1	10.9
TP1	--++	0	0.1	0.3		0	0.1	0.4
TP2	--++	0	32.1	0		0	10.8	0		0
TP2	-+-+	7.5	24.3	2.3		1.3	6.8	4.4
TP2	-+--	34.3	15.8	16.4	x	48.6	38.4	29
TP2	--+-	40.5	11.7	26.3		48.8	21.5	52.1
TP2	---+	0	9.9	0		0	13.4	0
TP2	-++-	11.9	2.5	35.4		0.8	5.2	3.7
TP2	-+++	5.5	2.4	17.1		0.4	0.8	10.5		-5.1
TP2	----	0.4	1.2	2.5		0	3.3	0.1
TP3	--+-	39.6	55.2	14.7		35.5	55.2	14.4
TP3	-+--	52.8	26.9	40.3	x	56.6	26.9	47
TP3	-++-	6.3	11.8	10.9		7.3	11.8	13.9
TP3	---+	0.2	4.3	1.1		0	4.3	0.3
TP3	----	1	0.9	22.9		0.5	0.9	13.1
TP3	-+++	0	0.8	0.5		0	0.8	0.5
TP3	-+-+	0	0.1	1.6		0	0.1	1.7
TP3	--++	0	0	8		0	0	9.2
TP4	--+-	2.3	66.5	0		5.6	66.4	0.1
TP4	-+--	1.3	30.3	0	x	1	30.3	0
TP4	-++-	87.9	3	32.7		83.8	2.9	39.9
TP4	----	8.5	0.3	32.7		9.6	0.3	46.9
TP4	--++	0	0	0.6		0	0	0.3
TP4	-+++	0	0	2.7		0	0	0.7
TP4	-+-+	0	0	4.3		0	0	1.4		0
TP4	---+	0	0	26.8		0	0	10.6		0
TS1	-++	0	42.5	0		12.6	40.9	6.9
TS1	---	0	27.6	0		50.7	25.9	44
TS1	-+-	0	20.8	0	x	33.5	16.8	44.6		33.5
TS1	--+	100	9.1	100		3.3	16.5	4.5		-96.7
TS2	--+	94	95	34.2		95.8	95.5	46.6		1.8
TS2	-+-	6	3.1	65.8		4.2	3.6	53.4		-1.8
TS2	---	0	1	0		0	0.6	0
TS2	-++	0	0.9	0	x	0	0.3	0
TS3A	-+-+	99.3		99.3		0.9	nan	0.9		-98.4
TS3A	--++	0.7		0.7		68	nan	68		67.3
TS3A	-+--	0		0	x	21.5	nan	21.5
TS3A	-++-	0		0		0	nan	0		0
TS3A	-+++	0		0		9.5	nan	9.5		9.5
TS3A	----	0		0		0.1	nan	0.1
TS3A	---+	0		0		0	nan	0		0
TS3A	--+-	0		0		0	nan	0
TS3B	-+-+	99.6	35	98.9	x	100	52.4	99.7		0.4
TS3B	-+++	0	15.7	0		0	8.7	0
TS3B	--+-	0	15	0		0	19.3	0
TS3B	-++-	0.4	12.9	1		0	0.3	0
TS3B	--++	0	8.5	0.1		0	0.5	0.1		0
TS3B	---+	0	7.6	0		0	1.1	0
TS3B	----	0	4.3	0		0	16.6	0
TS3B	-+--	0	1	0		0	1.1	0.2		0
TS4	---+	100		100		0	nan	0		-100
TS4	-+++	0		0	x	100	nan	100
TS4	-++-	0		0		0	nan	0		0
TS4	-+-+	0		0		0	nan	0		0
TS4	-+--	0		0		0	nan	0		0
TS4	--++	0		0		0	nan	0		0
TS4	--+-	0		0		0	nan	0		0
TS4	----	0		0		0	nan	0

## Sheet: Opt_crossvalidation
molecule	stereochemistry	overall	carbon	proton	Correct	pair_overall	pair_carbon	pair_proton
AT1	--	79.6	29.1	90.5		83.2	33.5	90.7
	-+	20.4	70.9	9.5	x	16.8	66.5	9.3
AT2	-+	100	95.9	100		100	99.6	100
	--	0	4.1	0	x	0	0.4	0
AT3	-+	98.6		98.6		98.1	nan	98.1
	--	1.4		1.4	x	1.9	nan	1.9
BYH1	-+-	0	0	56.9		54.3	18.2	52.6
	-++	0	0	7.3	x	15.8	56.7	4.9
	---	82.7	71.8	23.4		17	11.8	25.4
	--+	17.3	28.2	12.4		12.9	13.3	17.1
BYH2	-+-	70.4	91.5	0.7		35.6	63.3	18.9
	-++	29.4	1.6	15.6	x	0.4	1.3	10.1
	---	0.1	0	83.7		64	30.4	70.9
	--+	0.2	6.8	0		0	5	0.1
IP1	---	13.6	14.4	18.9		14.9	14.8	20.4
	--+	46.4	16.2	57.4	x	45.2	16.7	55.2
	-+-	26.5	32.5	16.4		27.1	32	17.2
	-++	13.5	36.9	7.3		12.8	36.5	7.2
IP2	-+	2.6	60.3	1.7		99.7	99.7	50.7
	--	97.4	39.7	98.3	x	0.3	0.3	49.3
IP3	--	33.3	18.6	68.6		30.4	18.6	65.7
	-+	66.7	81.4	31.4	x	69.6	81.4	34.3
IP4	--	19.9	29.7	37.1		19.8	29.4	37.3
	-+	80.1	70.3	62.9	x	80.2	70.6	62.7
IP5	-++	94	92.1	56.8		88.5	87.9	48.3
	-+-	0	0.1	0.3	x	0	0.1	0
	--+	0	0	0		0	1.3	0.5
	---	6	7.8	42.9		11.5	10.7	51.3
JB10	--+	85.8	54.4	77.2		2.3	8.2	17.2
	---	13.6	32.5	20.4	x	96.8	74.9	79.4
	-++	0.6	13.1	2.3		0.9	16.9	3.4
	-+-	0	0	0		0	0	0
JB11	-++-	0	72	0		80.7	75.7	56.7
	-+++	0	0	0	x	0	0	0
	-+--	0	0	0.1		0	0.1	0.8
	-+-+	0	0	0		0	0	0
	--+-	0	0	0		0	0	0
	--++	100	15.8	99.9		19.3	24.1	42.6
	----	0	0	0		0	0	0
	---+	0	12.2	0		0	0	0
JB12	-+++	99.8	73.4	90.5		8	94.9	0
	-++-	0	0	8.3	x	0	0	0
	-+-+	0	0.2	0		0	0.1	0
	-+--	0	0	0		2.1	0	99.5
	--++	0	0	0.6		0	0	0
	--+-	0.2	25.8	0.5		1	3.6	0
	---+	0	0	0		0	0	0
	----	0	0.6	0.1		88.8	1.4	0.5
JB13A	-++	100	100	89.4		100	100	87.9
	-+-	0	0	10.1	x	0	0	11.8
	--+	0	0	0		0	0	0
	---	0	0	0.5		0	0	0.3
JB13B	---	49.6	85.1	11.2		99.9	100	19.7
	--+	0	0	23.6	x	0	0	24.5
	-+-	0	0	0.3		0	0	0.5
	-++	50.4	14.9	64.9		0.1	0	55.4
JB1	---	0	42.6	0		45.4	9.3	14.4
	--+	0	0.3	0	x	0	0.4	0.1
	-+-	0	0.2	0		20.7	0.7	84.4
	-++	100	56.9	100		33.9	89.6	1.1
JB2	--+	0	1.1	0		0	4.7	0
	---	0.3	0	100	x	100	0	100
	-++	0	0.6	0		0	0.5	0
	-+-	99.7	98.4	0		0	94.8	0
JB3	-+-	96.4	88.4	43.2		100	100	100
	-++	3.6	2.7	53.7	x	0	0	0
	---	0	8.9	0		0	0	0
	--+	0	0	3.1		0	0	0
JB4	--	100	47.1	100		100	79.4	100
	-+	0	52.9	0	x	0	20.6	0
JB5	---	97.7	56.2	84.5		100	18.9	100
	--+	0	32.2	0	x	0	80.7	0
	-+-	2.1	9.1	11.2		0	0.3	0
	-++	0.2	2.6	4.2		0	0.2	0
JB6	-++++	83.3	1.3	93.6		99.8	9.8	94.5
	-+++-	0	1.3	0	x	0	0	0
	-++-+	0	0.1	0		0	3.1	0
	-++--	0	1	0		0	0.1	2.4
	-+-++	9.5	5.6	2.6		0	0.1	0
	-+-+-	3.5	6.7	0.8		0	0.7	0.4
	-+--+	0	11	0		0	19.5	0
	-+---	0.1	19.8	0		0	0.7	0
	--+++	0.1	0.2	0.6		0	0.1	0.3
	--++-	0	0.4	0		0	0.1	0.7
	--+-+	0	1.4	0		0	49.4	0
	--+--	0	2.7	0		0	3.3	0
	---++	0.3	8	0		0	10.9	0
	---+-	0	0	0		0	0.1	0
	----+	0	38.4	0		0	1.5	0
	-----	3.3	2.1	2.4		0.1	0.5	1.7
JB7	-++++	0	0	45.8		0	0.2	0
	-+++-	0	98.1	0	x	0	57.7	0
	-++-+	0	0	0		0	6	0
	-++--	0.4	1.5	0		96.7	8.3	23.7
	-+-++	4.6	0.2	0		0	0.8	0
	-+-+-	0	0	0		0	0.1	0
	-+--+	0	0.1	0		0	0.1	0
	-+---	95	0	54		2.6	2.5	2.1
	--+++	0	0	0		0	0	0
	--++-	0	0	0		0	6.9	0
	--+-+	0	0	0		0	0	0
	--+--	0	0.2	0		0	9.1	0
	---++	0	0	0.1		0.7	0	74.2
	---+-	0	0	0		0	2.5	0
	----+	0	0	0		0	0	0
	-----	0	0	0		0	5.8	0
JB8	-++++	64.8	41	45.1		35.9	41.5	1
	-+++-	0.3	0.6	12.8	x	20.9	0.6	38.3
	-++-+	0.1	2.7	0.7		0.1	2.6	0
	-++--	34.7	55	18		27.5	54.7	0.6
	-+-++	0	0	8.6		0.1	0	6.4
	-+-+-	0	0.3	2		15.5	0.3	53.3
	--+--	0.1	0.3	10.4		0	0.3	0.1
	-++--	0	0	2.3		0	0	0.4
JB9	--+	92.8	48.7	87.5		69.6	48.7	61.3
	---	7.1	50.6	6.5	x	30.1	50.5	25.6
	-++	0.1	0.7	6		0.2	0.7	13.1
	-+-	0	0	0.1		0	0	0
KE1	-+-	100	100	98.8		100	100	61.2
	-++	0	0	1.2	x	0	0	38.8
	---	0	0	0		0	0	0
	--+	0	0	0		0	0	0
KE2	-++++	20.7	18	2.6		32.5	19.3	0.7
	-+++-	52.7	6.9	17.2	x	3.6	10.6	0.1
	-++-+	0	0	0		0	0	0
	-++--	0	0	0		0	0	0
	-+-++	0	1.5	0		0	1.5	0
	-+-+-	0	17.5	0		0	21.5	0
	-+--+	0	0	0		0	0	0
	-+---	0	0	0		0	0	0
	--+++	0	2.5	0		0	3.3	0
	--++-	0	0	0		0	0	0
	--+-+	11.5	42.4	0.6		1.9	32.1	0
	--+--	10.7	0.3	78.5		54	0.2	98.8
	---++	0	0	0		0	0	0
	---+-	0	0	0		0	0	0
	----+	0	1.7	0		0	1.8	0
	-----	4.4	9.3	1.1		7.9	9.6	0.3
KE3	-+--+	99.7	98.1	26		99.6	99	26.8
	-+---	0	0	0	x	0	0	0
	-+-++	0	0.4	0		0	0	0
	-+-+-	0	0	0		0	0	0
	-++-+	0	0	0		0	0	0
	-++--	0	0	0		0	0	0
	-++++	0	0	0		0	0	0
	-+++-	0	0	0		0	0	0
	----+	0.1	0	51.6		0.1	0	49.2
	-----	0	0	0.8		0	0.1	0.9
	---++	0.1	0.2	19.9		0.3	0.4	21.6
	---+-	0	0.7	1.6		0	0.4	1.3
	--+-+	0	0	0		0	0	0
	--+--	0	0	0		0	0	0
	--+++	0	0	0		0	0	0
	--++-	0	0.6	0.1		0	0	0.1
NL1A	--+	54		54		85.9	nan	85.9
	---	0		0	x	0	nan	0
	-++	0		0		0	nan	0
	-+-	46		46		14.1	nan	14.1
NL1B	-++	98.3	65.1	81.1		98.7	22.2	99.6
	-+-	0.6	30.7	1.1	x	1.3	77.4	0.4
	--+	0	0.4	2.3		0	0.1	0
	---	1.1	3.7	15.5		0	0.3	0
NL2A	-+-++	0	0	0		35.9	5.6	55.2
	-+-+-	0.3	5.5	2.5	x	0	5.2	0
	-+--+	0	0	0		0	0.1	3.1
	-+---	0	0.1	0		0.1	2	0.6
	-++++	0	0	0		0	0	6.1
	-+++-	0	0	0		0	0	0.2
	-++-+	97.6	40.8	95.7		0.1	3.7	0.1
	-++--	0	1.3	0		0.5	0.4	9.2
	---++	0	0	0		0	0	0.5
	---+-	0	0	0.2		0	1.6	0
	----+	0	0	0		0	0.1	0.7
	-----	0	0.6	0		0.3	3.4	0.7
	--+++	0	0	0		60.9	75.8	6.9
	--++-	0	0	0		0	0	1
	--+-+	2.1	51.7	1.6		0	0.8	0
	--+--	0	0	0		2.2	1.2	15.5
NL2B	--+++	0	0	0		79.5	75.3	27.6
	--++-	99.4	0	99.4	x	0	0	0
	--+-+	0	0	0		0	0	1.7
	--+--	0	17.2	0		0	0	0.8
	---++	0	1.4	0		0	0	2.6
	---+-	0	0	0		0	0.1	0.2
	----+	0	0	0		0	0	0
	-----	0	0	0		10.9	12	23.7
	-++++	0	0	0		7.5	9.5	20.6
	-+++-	0.6	0	0.6		0	0	0
	-++-+	0	0	0		0	0.1	1
	-++--	0	81.4	0		0	0.2	0.7
	-+-++	0	0	0		0	0	0.8
	-+-+-	0	0	0		0	0	0.4
	-+--+	0	0	0		0	0	0
	-+---	0	0	0		2.1	2.8	19.9
NP1	--++---	88.6	83.9	7.8		97.1	84.1	1.6
	--+++--	0	0	0.1	x	0	0	0.2
	--+----	0.2	1.9	0.7		0	1.9	0
	--+-+--	0	0	0		0	0	0
	---+---	0	0	0		0	0	0
	---++--	0	0	0.7		0	0	34.8
	-------	0	0	0		0	0	0
	----+--	0	0	0		0	0	0
	-+++---	0.2	0.7	2.3		0	0.7	0
	-++++--	0	0	3.5		0	0	0
	-++----	0.1	0	12.3		0	0	0
	-++-+--	0	0	1.1		0	0	0
	-+-+---	0	0.1	1.8		0	0.1	0
	-+-++--	0	0	0.5		0	0	0
	-+-----	0	0	0		0	0	0
	-+--+--	0	0	0		0	0	0
	+-++---	0.1	1.2	0.5		0	1.2	0.1
	+-+++--	0	0	0		0	0	0
	+-+----	0	0.4	0		0	0.4	0
	+-+-+--	0	0	0		0	0	0
	+--+---	0	0.1	0		0	0.1	0
	+--++--	0	0.1	3.3		2.8	0.1	63.2
	+------	0	9.4	0		0	9.3	0
	+---+--	0	0.1	0.1		0	0.1	0
	++++---	10.7	1.3	63		0	1.3	0
	+++++--	0	0	0		0	0	0
	+++----	0	0	0.1		0	0	0
	+++-+--	0	0	0		0	0	0.1
	++-+---	0	0	0.9		0	0	0
	++-++--	0	0	0.4		0	0	0
	++-----	0	0.7	0.2		0	0.7	0
	++--+--	0	0	0.7		0	0	0
NP2	------	99.9	96.9	29.7	x	99.3	97	9.4
	-----+	0	0	1.9		0	0	1.2
	----+-	0	0	0.8		0	0	0.4
	----++	0	0	0.1		0	0	0.1
	---+--	0	2.3	0.6		0.4	2.5	1.6
	---+-+	0	0	0		0	0	0.3
	---++-	0	0	0		0	0	0.1
	---+++	0	0	0		0	0	0
	--+---	0	0	0.2		0	0	1.6
	--+--+	0	0	2.6		0	0	1.8
	--+-+-	0	0	0		0	0	0
	--+-++	0	0	0		0	0	0
	--++--	0	0	0		0	0	0.4
	--++-+	0	0	0.9		0	0	4.7
	--+++-	0	0	0		0	0	0.1
	--++++	0	0	0		0	0	0
	-+----	0	0	14.1		0	0	4.8
	-+---+	0	0.1	0.3		0	0.1	3.4
	-+--+-	0	0	12.3		0	0	6
	-+--++	0	0	0.7		0	0	1.7
	-+-+--	0	0	0		0	0	0
	-+-+-+	0	0	20.8		0	0	3.6
	-+-++-	0	0	0		0	0	0
	-+-+++	0	0	0.6		0	0	0.1
	-++---	0	0	0.2		0	0	4.8
	-++--+	0	0	0		0	0	2.1
	-++-+-	0	0	0.6		0	0	0.2
	-++-++	0	0	0		0	0	0.1
	-+++--	0	0	6.9		0	0	46.7
	-+++-+	0	0.4	1.3		0.2	0.4	4.6
	-++++-	0	0	0.6		0	0	0
	-+++++	0	0.2	4.8		0	0	0.2
NP3A	---+	1.3	23.4	1		0.3	24.4	0.2
	----	0	0	0.3	x	0	0.1	0
	--++	71.1	18.6	69.6		60.3	17.7	66.3
	--+-	0	0	0.1		0	0	0.3
	-+-+	2.2	25.9	1.5		0.5	27.4	0.3
	-+--	25.2	31.7	14.5		38.9	30.3	24.9
	-+++	0	0	1		0	0	7.8
	-++-	0.2	0.4	11.9		0	0	0.2
NP3B	--+-	0.4	14	0.2		2.4	13.7	5.6
	--++	0.6	0.4	9.4	x	0	0.4	1.4
	----	83.2	6.4	82.7		3.9	7.6	16.4
	---+	0.1	2.8	0.1		0.4	2.8	4.4
	-++-	13.3	60.2	1.4		82.2	58.4	44.7
	-+++	0.3	1.6	1.3		0.1	1.7	1.7
	-+--	0.5	0.8	4.1		0.1	1	1.9
	-+-+	1.6	13.7	0.8		10.9	14.5	23.9
NP4	---+	16.8	8.9	6.9		99.3	9.7	98.7
	----	2.3	34.3	0.2	x	0.3	37.1	0.1
	--++	4.3	7.7	2.1		0	0	0
	--+-	0	0	0.3		0	0	0
	-+-+	0	0	0.9		0	0	0.8
	-+--	0.6	0	81.7		0	0	0.3
	-+++	75.3	35.3	7.8		0.4	38.3	0.1
	-++-	0.6	13.8	0.2		0	14.8	0
NP5	---+	100	99.8	99.7		100	99.8	100
	--++	0	0.2	0.3	x	0	0.2	0
OD1	-+-	0	10.4	0		1	1.1	0
	-++	100	0.4	100	x	99	0	100
	---	0	68	0		0	97.3	0
	--+	0	21.3	0		0	1.6	0
TP1	-+--	7.3	37.3	3.1		8.5	37.3	3.4
	-+-+	0	1	0.3	x	0	1	0.5
	-++-	0	13.2	0		0	13.3	0
	-+++	0	11	0		0	11	0
	----	0	18.1	0		0	18.1	0
	---+	0.1	0.1	10.4		0.1	0.1	12.6
	--+-	92.4	19	75.7		91.2	19	70.6
	--++	0.1	0.2	10.5		0.2	0.2	12.9
TP2	-+--	0.9	4.1	4.7		0.1	0.6	13
	-+-+	5	19.9	5.1	x	0.1	0.6	5.3
	-++-	1.8	3.9	9.6		0.1	4.7	1
	-+++	2.6	1.4	39.4		0	0.3	10.2
	----	1.5	10.2	3.1		0	1.4	1.6
	---+	0	3.9	0		0	0.6	0
	--+-	88.1	47.7	38.1		99.7	91.4	68.3
	--++	0	9	0		0	0.3	0.6
TP3	-+--	43.2	21.1	38.4		49.1	21.2	49.9
	-+-+	0	0.1	0.9	x	0	0.1	1
	-++-	11.8	19.6	11.2		9.9	19.6	10.9
	-+++	0	0.5	0.6		0	0.5	0.6
	----	0.6	0.5	25.5		0.2	0.5	11.8
	---+	0.2	1.5	3.1		0.1	1.5	1.4
	--+-	44.1	56.7	14.6		40.6	56.6	15.4
	--++	0	0	5.6		0	0	9
TP4	-+--	0.3	23.5	0		0.4	23.5	0
	-+-+	0	0	0.8	x	0	0	0.7
	-++-	1.4	3.5	1.1		4.1	3.5	3.5
	-+++	0	0	3.8		0	0	2.7
	----	98	3.1	91.5		94	3.1	88.8
	---+	0	0	2.5		0	0	4
	--+-	0.3	69.9	0		1.4	69.8	0.1
	--++	0	0	0.2		0	0	0.1
TS1	-+-	59.5	23	49.6		0	7.2	0.2
	-++	7.7	4.3	34.3	x	0	1.2	0.1
	---	7.5	23.8	6.1		3.2	3.4	46.2
	--+	25.2	48.8	9.9		96.7	88.1	53.5
TS2	-++	0	6.4	0		0	5.3	0
	-+-	7.9	5.4	42.5	x	11.4	8.8	44.3
	--+	73.8	67.4	31.8		80.9	66.7	41.7
	---	18.3	20.8	25.7		7.7	19.1	13.9
TS3A	-+--	0		0		0	nan	0
	-+-+	9.6		9.6	x	0.1	nan	0.1
	-++-	0.1		0.1		0	nan	0
	-+++	0		0		0	nan	0
	----	0		0		0	nan	0
	---+	0		0		0	nan	0
	--+-	69.9		69.9		72.8	nan	72.8
	--++	20.3		20.3		27	nan	27
TS3B	-+-+	30.7	23.3	13.3		92.5	44.4	82.2
	-+--	0	5.3	0	x	0	20.3	0
	-+++	0	16.1	0		0	2.7	0
	-++-	2.3	11.2	2		0	0.2	0
	---+	0.2	16.7	0.1		0	0.7	0.3
	----	0	6	0		0	6.7	0
	--++	16.9	14.5	11.7		7	19.7	14.1
	--+-	49.9	6.9	72.8		0.5	5.2	3.5
TS4	-+++	0		0		2.3	nan	2.3
	-++-	0		0		0	nan	0
	-+-+	0		0		0	nan	0
	-+--	0		0		0.8	nan	0.8
	--++	0		0		96.8	nan	96.8
	--+-	0		0		0	nan	0
	---+	100		100		0	nan	0
	----	0		0		0	nan	0

## Sheet: MM_3g
molecule	stereochemistry	overall	carbon	proton	correct	pair_overall	pair_carbon	pair_proton
AT1	--	98.9	84.5	94.5	x	99.1	84.9	94.9
	-+	1.1	15.5	5.5		0.9	15.1	5.1
AT2	-+	100	93.9	99.4	x	100	99.7	100
	--	0	6.1	0.6		0	0.3	0
AT3	-+	96.1		96.1	x	96.7		96.7
	--	3.9		3.9		3.3		3.3
BYH1	-+-	15.1	4.5	11.8	x	81.6	86.4	20.9
	-++	6.4	0.3	65		0.1	5	0.5
	---	74.6	94.5	2.8		0.2	3.3	1.4
	--+	3.8	0.7	20.5		18.1	5.2	77.2
BYH2	-+-	99.5	89	80	x	99.2	26	88.7
	-++	0.5	2.6	13.2		0.4	1.3	6.2
	---	0	0.3	6.8		0.5	2.2	5.1
	--+	0	8.1	0		0	70.5	0
IP1	---	5.3	12.7	6.4	x	6.2	13	7.9
	--+	69	12.7	83.1		59.6	13	76.5
	-+-	13.7	35.7	5.9		21.1	35.4	9.9
	-++	12	38.9	4.7		13.1	38.7	5.6
IP2	-+	0	91.3	0	x	36.2	92.5	4.4
	--	100	8.7	100		63.8	7.5	95.6
IP3	--	99.2	57.8	98.9	x	63.6	4.4	97.4
	-+	0.8	42.2	1.1		36.4	95.6	2.6
IP4	--	99.3	98.4	70.6	x	99.9	99	87.4
	-+	0.7	1.6	29.4		0.1	1	12.6
IP5	--+	45.7	83.9	11	x	19.5	84.6	2.6
	---	0	0	20.6		0	0.4	0
	-++	0	0.1	0.2		0	5.7	0
	-+-	54.3	16	68.3		80.5	9.3	97.4
JB10	--+	42.7	95	1.2	x	79.1	94.1	13.2
	---	0.3	3.4	0.3		19.1	4.3	69
	-++	56.9	1.5	98.6		1.8	1.6	17.8
	-+-	0	0	0		0	0	0
JB11	-++-	0.3	92.5	0	x	99.7	93.3	95
	-+++	0	1.1	0		0	0	0
	-+--	0	0	0		0	1.9	0
	-+-+	0	0	0		0	0	0
	--+-	0	0	0		0	0	0
	--++	99.7	5.4	100		0.3	4.8	4.9
	----	0	0	0		0	0	0
	---+	0	0.9	0		0	0.1	0.1
JB12	-+++	0.9	0.2	5.4	x	0.2	1.8	0
	-++-	8.5	0.5	23.7		0.1	0	0.9
	-+-+	73.8	1.6	61.5		0.8	40.3	0
	-+--	7.3	62.2	0.2		42.5	0.5	22.2
	--++	0.7	0.1	8.8		51	0.2	76.4
	--+-	8.9	32.3	0.4		5.4	34.5	0
	---+	0	0	0		0	0	0.5
	----	0	3	0		0.1	22.8	0
JB13A	-++	99.8	91.1	89	x	99.6	83.4	82.4
	-+-	0	0	8.7		0	0	15.9
	--+	0	0	0		0	0	0
	---	0.2	8.9	2.3		0.4	16.6	1.7
JB13B	---	0.1	0.3	14.7	x	91.9	97.9	16.2
	--+	0	0.3	0		0	0.3	0.2
	-+-	0	0.1	8.1		0	0.1	1.1
	-++	99.9	99.3	77.2		8.1	1.7	82.5
JB1	---	0	17.2	0.1	x	3.4	2.6	53.4
	--+	0	0.7	0		0	0.1	3.9
	-+-	0	0.4	0.1		0.2	2.4	2.5
	-++	100	81.8	99.8		96.4	95	40.2
JB2	--+	0.1	2.6	0	x	5	2.8	0
	---	99.5	0.4	100		75.4	0	100
	-++	0	0	0		0	0.3	0
	-+-	0.4	97	0		19.6	96.9	0
JB3	-+-	0.4	4.8	5.5	x	100	99.9	1.9
	-++	0.1	2.3	3.7		0	0.1	0
	---	98.6	90.8	66.8		0	0	89.8
	--+	0.8	2.1	24		0	0	8.3
JB4	--	100	78.2	100	x	100	83.3	100
	-+	0	21.8	0		0	16.7	0
JB5	---	100	97	100	x	100	93.2	100
	--+	0	0	0		0	5.5	0
	-+-	0	2.3	0		0	1.2	0
	-++	0	0.7	0		0	0.1	0
JB6	-++++	99.9	21.5	98.7	x	97.7	65.2	63.7
	-+++-	0	0	0		0	0	2
	-++-+	0	0.3	0		0	2.2	0
	-++--	0	0	0.2		0	0	7.5
	-+-++	0	7.4	0		0	0	0.2
	-+-+-	0	0	0		0	0	0.1
	-+--+	0	19.4	0		0	7	0
	-+---	0	0.3	0		0	0.2	0
	--+++	0	0.3	0		0	0.7	0
	--++-	0	0	0.4		0	0	2.1
	--+-+	0	5.2	0		0	14.1	0
	--+--	0	41.2	0		0	4.5	0
	---++	0	0.6	0		0	1.9	0
	---+-	0	0	0		0	0	0
	----+	0	0	0		0	0	0
	-----	0.1	3.8	0.7		2.3	4.1	24.4
JB7	-++++	46.9	0	75.7	x	0	3.3	0
	-+++-	3.7	84.4	0		0	0.9	0
	-++-+	0	9.5	0		0	19.5	0
	-++--	0.3	0.9	0		0	0.7	0
	-+-++	0	0	0		0	0.6	0
	-+-+-	0	0	0		0	0.9	0
	-+--+	0	0.2	0		0	53.1	0
	-+---	0	0	0		3.3	0.5	0.2
	--+++	48.9	0.1	23.7		0	0.1	0
	--++-	0	2.4	0		0	12.4	0
	--+-+	0	0.4	0		0	0.3	0
	--+--	0	1.9	0		0	0.5	0
	---++	0	0	0.1		0	0.8	0
	---+-	0	0	0		0	0.6	0
	----+	0	0.1	0		96.7	0	99.8
	-----	0.1	0	0.5		0	6	0
JB8	-++++	5.5	3.3	39.6	x	4.2	3.4	29.4
	-+++-	0.1	0.3	4.8		0.3	0.3	29.1
	-++-+	5.4	7.6	17.3		0.1	7.5	0.4
	-++--	88.1	85.3	24.9		93.6	85.4	25.8
	-+-++	0	0.3	4.2		0	0.3	0.5
	-+-+-	0.9	2.9	7.8		1.7	2.8	14.4
	-+--+	0	0.3	1.4		0	0.3	0.2
	-+---	0	0	0.1		0	0	0.1
JB9	--+	63.2	20.3	48.5	x	36.8	20.3	35.9
	---	35.9	79.4	7		62.3	79.3	15.5
	-++	1	0.3	44.1		0.8	0.3	48.4
	-+-	0	0	0.4		0	0	0.2
KE1	-+-	93.7	79.4	76.2	x	66.6	85.9	24.4
	-++	6.2	18.1	22.2		33.4	14	75.4
	---	0	1.7	1.6		0	0	0.2
	--+	0	0.8	0		0	0.1	0
KE2	-++++	20.7	1.9	20.8	x	2	2.2	1.7
	-+++-	1.7	0.9	3.5		0	1	0
	-++-+	0	1.5	0		0	1.8	0
	-++--	0	0.9	0		0.1	1	0.2
	-+-++	0	3.9	0		0	4.7	0
	-+-+-	0	0.4	0		0	0.5	0
	-+--+	28	1.7	33.2		39.5	1.5	47.5
	-+---	0	1.3	0		0	1.3	0
	--+++	0.1	32.5	0		0	29.3	0
	--++-	3.6	2.5	2.8		0.5	2.4	0.4
	--+-+	0	2	0		0	1.8	0
	--+--	45.8	2.3	39.6		57.8	2	50.2
	---++	0	0	0		0	0.7	0
	---+-	0	0	0		0	0	0
	----+	0	47.1	0		0	48.6	0
	-----	0	1.1	0.1		0.1	1.3	0.1
KE3	-+--+	15.9	2.8	16.1	x	22	16.5	19.5
	-+---	0	0.1	0		0	0	0
	-+-++	0	3.1	0		0	0.2	0
	-+-+-	0	0.1	0.4		0	0.3	0.2
	-++-+	0.2	79.8	0		0	0.6	0
	-++--	0	0.2	0		0	0.1	0
	-++++	0	0.2	0		0	0	0
	-+++-	0	0	0		0	0.1	0
	----+	6.7	2	9.8		0.3	0.3	16.8
	-----	0.3	0.9	0.8		0.2	2.1	1.3
	---++	5.4	0.3	51		7	2.1	47.7
	---+-	0.1	0.1	1.5		0	0.3	1.1
	--+-+	0	0	0		0	0.2	0.1
	--+--	0	0.1	0		0	0.3	0
	--+++	0	0	0		0	0.1	0
	--++-	71.5	10.2	20.3		70.5	77	13.4
NL1A	--+	54.7		54.7	x	94.7	nan	94.7
	---	0		0		0	nan	0
	-++	0		0		0	nan	0
	-+-	45.3		45.3		5.3	nan	5.3
NL1B	-++	42.8	47	11.6	x	92.1	34.9	95.6
	-+-	7	1.4	65.4		0	0.4	0
	--+	0.2	0.2	10.6		0	0.1	0
	---	50	51.4	12.4		7.9	64.6	4.4
NL2A	-+-++	0	0	0	x	94.7	nan	94.7
	-+-+-	0	0	0		0	nan	0
	-+--+	0	42.6	0		0	nan	0
	-+---	0	0.9	0		5.3	nan	5.3
	-++++	0	0	0		92.1	34.9	95.6
	-+++-	99.3	1.7	99.8		0	0.4	0
	-++-+	0	0	0		0	0.1	0
	-++--	0	0.2	0		7.9	64.6	4.4
	---++	0	0	0		0.1	0.7	4.6
	---+-	0	0	0		0	0.2	0.3
	----+	0.7	8.4	0.2		0	13.2	0.1
	-----	0	0	0		0	1	1
	--+++	0	2.9	0		0	0.1	1.1
	--++-	0	42.1	0		98.8	42.1	82.8
	--+-+	0	0	0		0	1.1	0.7
	--+--	0	1.1	0		0.1	6.9	0.3
NL2B	--+++	0	0.1	0	x	0	1.1	0.6
	--++-	0	46.7	0		0	0.5	1.9
	--+-+	0	0.3	0		0.4	18.1	0.8
	--+--	0	0.4	0		0.3	4.4	2.1
	---++	0	0.1	0		0	0	0.6
	---+-	0	0	96.5		0	7.2	0.1
	----+	81.3	4.3	1.2		0	0.7	0.1
	-----	0	0	0		0.2	2.7	2.8
	-++++	0	0	0		67.6	46.1	36.6
	-+++-	0	40.8	0		0	0	0.2
	-++-+	0	0	0		0	0.1	0.6
	-++--	0	0.2	0		0	0	10.1
	-+-++	0	4.5	0		0	0	0.1
	-+-+-	18.7	0.5	2.3		0	0	0.8
	-+--+	0	2.1	0		0	0	1.4
	-+---	0	0	0		2.2	5.9	9.3
NP1	--++---	57.1	57.4	7.5	x	22	25	22
	--+++--	0	0.1	0.2		0	0	1.5
	--+----	0	1	0.3		0	0	0.4
	--+-+--	0	0	0.2		0	0	4.3
	---+---	0	0.1	0		0	0	2.6
	---++--	0.1	0.3	1.8		0	0.1	0.9
	-------	0	0	0		0	0	0.2
	----+--	0	0	0		8.2	22.7	9
	-+++---	6.9	2.4	21.4		95	59	4
	-++++--	0	0	0		0	0.1	0.3
	-++----	0	0.1	0.1		0	1	0.1
	-++-+--	0	0	0		0	0	0
	-+-+---	0	0.2	0.3		0	0.1	0.2
	-+-++--	0	0	0		0.3	0.1	13.7
	-+-----	0	0	0.1		0	0	0
	-+--+--	0	0	0		0	0	0
	+-++---	0	2.2	0.1		0	0.1	0
	+-+++--	0	0.1	0		0	0	0
	+-+----	0	0.1	0		0	0.1	0.1
	+-+-+--	0	0.2	0.3		0	0	0
	+--+---	0	0	0		0	0.2	0
	+--++--	0.1	0.1	5.2		0	0	0
	+------	0	5.5	0		0	0	0.1
	+---+--	0.7	21.5	0.3		0	0	0
	++++---	32.9	5.9	42		0	2.2	0
	+++++--	0	0	0		0	0.1	0
	+++----	0	0	0		0	0.1	0
	+++-+--	0	0.2	1.2		0	0.2	0
	++-+---	0.4	0.2	12		0	0	0
	++-++--	0	0.2	0		4.3	0.1	77.5
	++-----	0	0.2	0		0	5.6	0
	++--+--	1.8	2	6.8		0	22.1	0
NP2	------	99.9	98	25.9	x	0	6.1	0
	-----+	0	0	5.9		0	0	0
	----+-	0	0	0.4		0	0	0
	----++	0	0	0.1		0.3	0.2	4
	---+--	0	1.1	0.6		0	0.2	0
	---+-+	0	0.8	0		0	0.2	0
	---++-	0	0	0		0	0.2	0
	---+++	0	0	0		0	2	0
	--+---	0	0	0.1		99.5	98.6	15.2
	--+--+	0	0	0.5		0	0	2.7
	--+-+-	0	0	0		0	0	0.3
	--+-++	0	0	0		0	0	0.3
	--++--	0	0	0		0.5	1.3	5.4
	--++-+	0	0	2.8		0	0	0.4
	--+++-	0	0	0		0	0	0.1
	--++++	0	0	0		0	0	0
	-+----	0	0	31		0	0	4.8
	-+---+	0	0	0.6		0	0	2.9
	-+--+-	0	0	8.9		0	0	0
	-+--++	0	0	1.3		0	0	0
	-+-+--	0	0	0		0	0	0.3
	-+-+-+	0	0	9.4		0	0	8.9
	-+-++-	0	0	0		0	0	0
	-+-+++	0	0	0.5		0	0	0
	-++---	0	0	0.2		0	0	8.2
	-++--+	0	0	0		0	0	14.8
	-++-+-	0	0	1.5		0	0	4.9
	-++-++	0	0	0		0	0	7.2
	-+++--	0	0	3.2		0	0	0.1
	-+++-+	0	0.1	0		0	0	8.3
	-++++-	0	0	6.6		0	0	0
	-+++++	0	0	0.3		0	0	0.3
NP3A	---+	0.9	5.3	5.6	x	0	0	7.3
	----	0	0.2	0.6		0	0	0.8
	--++	77.1	38.3	64.7		0	0	1.8
	--+-	0	0	0		0	0	0.4
	-+-+	0.9	6.1	4.5		0	0	2.7
	-+--	21.1	50	13.6		0	0.1	0.6
	-+++	0	0.1	2.4		0	0	0.9
	-++-	0	0	8.6		0	0	0.4
NP3B	--+-	0.6	7.3	1.7	x	1.3	5.4	8.2
	--++	3.2	5.7	11.7		0	0.2	0
	----	87.4	24.9	72.7		76.4	38.2	66.7
	---+	0	1.6	0.1		0	0	0
	-++-	3	35.1	1.7		1.5	6.4	7.7
	-+++	3.6	11.9	6.2		20.7	49.7	13.9
	-+--	2.1	8.1	5.5		0	0.1	3.2
	-+-+	0.1	5.5	0.4		0	0	0.2
NP4	---+	0	6.6	0	x	6.8	6.6	21.3
	----	0	48.9	0		0.8	5.7	3.1
	--++	0	5.8	0		19.6	27.7	14.7
	--+-	100	0	100		0.1	1.5	1.5
	-+-+	0	0	0		65	32.6	41.4
	-+--	0	0.2	0		3.1	11.5	5.6
	-+++	0	32.3	0		3.3	8.9	7.7
	-++-	0	6.3	0		1.2	5.4	4.6
NP5	---+	100	99.3	99.5	x	100	99.3	100
	--++	0	0.7	0.5		0	0.7	0
OD1	-+-	5	37	2.8	x	4.2	0.2	2.5
	-++	53.7	14.8	75.9		95.8	0.1	97.5
	---	41	45.4	18.9		0	96.8	0
	--+	0.3	2.9	2.5		0	2.9	0
TP1	-+--	2.6	2.3	8.2	x	2.8	2.3	8.2
	-+-+	3	2.6	8.3		4.3	2.6	11
	-++-	0	44.1	0		0	44.1	0
	-+++	12.1	8.7	10.1		13.3	8.7	10.4
	----	0	20.2	0		0	20.2	0
	---+	1.4	3.2	3.2		1.6	3.2	3.5
	--+-	80.2	18.7	31.1		77.2	18.8	27.8
	--++	0.6	0.1	38.9		0.7	0.1	39.2
TP2	-+--	19.2	5.8	34	x	1.4	7.1	10.1
	-+-+	0.1	23.4	0		0	1.9	0.3
	-++-	0.4	9.6	0.4		0.2	22.5	0.4
	-+++	18.1	7.6	24.6		0.3	1.4	8.9
	----	0	7.6	0		0	1	0
	---+	0	5.9	0		0	1.1	0
	--+-	62.2	15.7	40.8		98.2	62.6	80.2
	--++	0	24.3	0		0	2.4	0
TP3	-+--	0.9	9.4	3.7	x	0.6	9.4	2.1
	-+-+	0	1.4	0.2		0	1.4	0.4
	-++-	85	62.6	50.8		94.7	62.6	50.2
	-+++	0.1	1.9	1.8		0.1	1.9	1.5
	----	0.2	2.1	3.6		0.4	2.1	6.9
	---+	0.1	1.1	1.7		0	1.1	0.6
	--+-	13.6	21.1	24.1		3.9	21.1	6.1
	--++	0.1	0.3	14.1		0.3	0.3	32.2
TP4	-+--	0.2	8.2	0.2	x	2.6	8.2	2.6
	-+-+	0.1	0.1	8.2		0	0.1	2
	-++-	69.3	22.8	22.6		23.7	22.7	8.5
	-+++	1.3	0.6	16.1		0.6	0.6	8.7
	----	24.8	16	11.5		67.6	16	34.4
	---+	0.1	0	40.5		0.1	0	42.6
	--+-	4.2	52.2	0.6		5.3	52.2	0.8
	--++	0	0.1	0.3		0	0.1	0.4
TS1	-+-	0.1	46.2	0	x	0	1.5	0
	-++	26.8	19.6	19.6		0.4	12.3	0.5
	---	72.9	13.1	80.2		81.1	14.1	95.2
	--+	0.2	21.1	0.1		18.5	72	4.3
TS2	-++	0	19.9	0	x	0	21.8	0
	-+-	13.9	3.3	77.1		36.7	6.4	85.1
	--+	86	70.3	22.7		63.3	63.6	14.8
	---	0	6.4	0.1		0	8.1	0
TS3A	-+--	7.9		7.9	x	1.2	nan	1.2
	-+-+	4.5		4.5		0	nan	0
	-++-	0.3		0.3		0	nan	0
	-+++	0		0		0	nan	0
	----	0		0		0	nan	0
	---+	0.1		0.1		0	nan	0
	--+-	0.3		0.3		0	nan	0
	--++	86.9		86.9		98.8	nan	98.8
TS3B	-+-+	0	25.3	0	x	24	35.5	10.8
	-+--	0.1	6.6	0.6		14.8	16.2	14.6
	-+++	0	1.1	0		0	3.4	0
	-++-	0.1	8.8	0.3		0	5.3	0
	---+	0	15.3	0		0	3	0.1
	----	0	1	0		0	7.5	0
	--++	99.8	37.5	99		61.3	13.2	74.5
	--+-	0	4.4	0		0	16	0
TS4	-+++	0		0	x	25.1	nan	25.1
	-++-	0.4		0.4		0	nan	0
	-+-+	0.4		0.4		0	nan	0
	-+--	0		0		1	nan	1
	--++	0		0		4.1	nan	4.1
	--+-	0		0		0	nan	0
	---+	99.2		99.2		0	nan	0
	----	0		0		69.8	nan	69.8
